# Supplementary material for: An algorithm for the determination and quantification of components of nucleic acid mixtures based on single sequencing reactions
Source: PubMed Central journal article supplement (PMC1318471; doi:10.1186/1471-2105-6-281), 2005-11-29
Supplement: 1471-2105-6-281-S1.pdf [file 1471-2105-6-281-S1.pdf]

|                      | <b>observed average</b> | <b>SD of average</b> | <b>expected</b> |
|----------------------|-------------------------|----------------------|-----------------|
| <b>mix 1</b>         |                         |                      |                 |
| <b>Algae</b>         | 0,004                   | 0,01                 | 0,00            |
| <b>Cyclops</b>       | 0,204                   | 0,01                 | 0,17            |
| <b>Ephemeroptera</b> | 0,204                   | 0,04                 | 0,17            |
| <b>Harpacticoid</b>  | 0,196                   | 0,02                 | 0,17            |
| <b>Nematod</b>       | 0,100                   | 0,01                 | 0,17            |
| <b>Ostracod</b>      | 0,177                   | 0,02                 | 0,17            |
| <b>Tardigrade</b>    | 0,116                   | 0,02                 | 0,17            |
|                      |                         |                      |                 |
| <b>mix 2</b>         |                         |                      |                 |
| <b>Algae</b>         | 0,004                   | 0,01                 | 0,00            |
| <b>Cyclops</b>       | 0,154                   | 0,01                 | 0,13            |
| <b>Ephemeroptera</b> | 0,064                   | 0,02                 | 0,06            |
| <b>Harpacticoid</b>  | 0,331                   | 0,02                 | 0,31            |
| <b>Nematod</b>       | 0,076                   | 0,01                 | 0,13            |
| <b>Ostracod</b>      | 0,329                   | 0,02                 | 0,31            |
| <b>Tardigrade</b>    | 0,042                   | 0,01                 | 0,06            |
|                      |                         |                      |                 |
| <b>mix 3</b>         |                         |                      |                 |
| <b>Algae</b>         | -0,001                  | 0,01                 | 0,00            |
| <b>Cyclops</b>       | 0,391                   | 0,02                 | 0,31            |
| <b>Ephemeroptera</b> | 0,169                   | 0,03                 | 0,13            |
| <b>Harpacticoid</b>  | 0,092                   | 0,01                 | 0,06            |
| <b>Nematod</b>       | 0,186                   | 0,02                 | 0,31            |
| <b>Ostracod</b>      | 0,070                   | 0,02                 | 0,06            |
| <b>Tardigrade</b>    | 0,093                   | 0,01                 | 0,13            |
|                      |                         |                      |                 |
| <b>mix 4</b>         |                         |                      |                 |
| <b>Algae</b>         | 0,003                   | 0,01                 | 0,00            |
| <b>Cyclops</b>       | 0,107                   | 0,04                 | 0,06            |
| <b>Ephemeroptera</b> | 0,333                   | 0,04                 | 0,31            |
| <b>Harpacticoid</b>  | 0,138                   | 0,03                 | 0,13            |
| <b>Nematod</b>       | 0,031                   | 0,01                 | 0,06            |
| <b>Ostracod</b>      | 0,155                   | 0,03                 | 0,13            |
| <b>Tardigrade</b>    | 0,233                   | 0,03                 | 0,31            |

Averages and standard deviations for the replicates for each mix. Individual values are listed below.

| mix 1: A : C : E : H : N : O : T = 0 : 0.17 : 0.17 : 0.17 : 0.17 : 0.17 : 0.17 |              |        |       |       |                     |       |       |       |
|--------------------------------------------------------------------------------|--------------|--------|-------|-------|---------------------|-------|-------|-------|
| replicates                                                                     | values found |        |       |       | standard deviations |       |       |       |
|                                                                                | 1            | 2      | 3     | 4     | 1                   | 2     | 3     | 4     |
| library 1                                                                      |              |        |       |       |                     |       |       |       |
| Algae                                                                          | 0,000        | 0,003  | 0,013 | 0,006 | 0,006               | 0,007 | 0,007 | 0,011 |
| Cyclops                                                                        | 0,200        | 0,200  | 0,216 | 0,194 | 0,010               | 0,011 | 0,012 | 0,019 |
| Ephemeroptera                                                                  | 0,177        | 0,189  | 0,169 | 0,208 | 0,011               | 0,011 | 0,012 | 0,019 |
| Harpacticoid                                                                   | 0,203        | 0,212  | 0,187 | 0,207 | 0,011               | 0,012 | 0,013 | 0,020 |
| Nematod                                                                        | 0,118        | 0,118  | 0,116 | 0,112 | 0,009               | 0,010 | 0,011 | 0,017 |
| Ostracod                                                                       | 0,206        | 0,186  | 0,200 | 0,185 | 0,014               | 0,014 | 0,016 | 0,025 |
| Tardigrade                                                                     | 0,095        | 0,093  | 0,099 | 0,087 | 0,004               | 0,004 | 0,004 | 0,006 |
| library 2                                                                      |              |        |       |       |                     |       |       |       |
| Algae                                                                          | -0,008       | 0,002  | 0,014 | 0,000 | 0,011               | 0,013 | 0,010 | 0,021 |
| Cyclops                                                                        | 0,212        | 0,210  | 0,227 | 0,202 | 0,011               | 0,014 | 0,010 | 0,021 |
| Ephemeroptera                                                                  | 0,186        | 0,198  | 0,175 | 0,217 | 0,011               | 0,013 | 0,010 | 0,021 |
| Harpacticoid                                                                   | 0,209        | 0,214  | 0,192 | 0,210 | 0,011               | 0,013 | 0,010 | 0,021 |
| Nematod                                                                        | 0,104        | 0,106  | 0,100 | 0,101 | 0,009               | 0,011 | 0,008 | 0,017 |
| Ostracod                                                                       | 0,178        | 0,154  | 0,170 | 0,163 | 0,013               | 0,016 | 0,012 | 0,024 |
| Tardigrade                                                                     | 0,119        | 0,116  | 0,122 | 0,107 | 0,005               | 0,006 | 0,004 | 0,009 |
| library 3                                                                      |              |        |       |       |                     |       |       |       |
| Algae                                                                          | -0,007       | -0,001 | 0,015 | 0,001 | 0,010               | 0,010 | 0,011 | 0,016 |
| Cyclops                                                                        | 0,205        | 0,204  | 0,220 | 0,193 | 0,011               | 0,011 | 0,012 | 0,018 |
| Ephemeroptera                                                                  | 0,246        | 0,260  | 0,232 | 0,286 | 0,015               | 0,015 | 0,016 | 0,023 |
| Harpacticoid                                                                   | 0,167        | 0,173  | 0,153 | 0,168 | 0,009               | 0,009 | 0,010 | 0,015 |
| Nematod                                                                        | 0,085        | 0,084  | 0,081 | 0,080 | 0,007               | 0,007 | 0,007 | 0,011 |
| Ostracod                                                                       | 0,170        | 0,150  | 0,161 | 0,152 | 0,011               | 0,012 | 0,013 | 0,018 |
| Tardigrade                                                                     | 0,134        | 0,130  | 0,138 | 0,119 | 0,005               | 0,005 | 0,006 | 0,008 |
| library 4                                                                      |              |        |       |       |                     |       |       |       |
| Algae                                                                          | 0,000        | 0,005  | 0,015 | 0,007 | 0,007               | 0,008 | 0,009 | 0,014 |
| Cyclops                                                                        | 0,192        | 0,193  | 0,207 | 0,188 | 0,009               | 0,010 | 0,011 | 0,017 |
| Ephemeroptera                                                                  | 0,170        | 0,183  | 0,162 | 0,201 | 0,010               | 0,011 | 0,012 | 0,019 |
| Harpacticoid                                                                   | 0,210        | 0,217  | 0,195 | 0,213 | 0,010               | 0,011 | 0,012 | 0,019 |
| Nematod                                                                        | 0,099        | 0,100  | 0,096 | 0,094 | 0,008               | 0,009 | 0,010 | 0,015 |
| Ostracod                                                                       | 0,200        | 0,177  | 0,193 | 0,181 | 0,013               | 0,015 | 0,016 | 0,024 |
| Tardigrade                                                                     | 0,128        | 0,124  | 0,131 | 0,117 | 0,004               | 0,005 | 0,005 | 0,008 |

| mix 2: A : C : E : H : N : O : T = 0 : 0.13 : 0.06 : 0.31 : 0.13 : 0.31 : 0.06 |              |        |        |       |                     |       |       |       |
|--------------------------------------------------------------------------------|--------------|--------|--------|-------|---------------------|-------|-------|-------|
| replicates                                                                     | values found |        |        |       | standard deviations |       |       |       |
|                                                                                | 1            | 2      | 3      | 4     | 1                   | 2     | 3     | 4     |
| library 1                                                                      |              |        |        |       |                     |       |       |       |
| Algae                                                                          | 0,014        | -0,002 | 0,002  | 0,010 | 0,007               | 0,005 | 0,006 | 0,013 |
| Cyclops                                                                        | 0,144        | 0,149  | 0,153  | 0,134 | 0,012               | 0,008 | 0,010 | 0,022 |
| Ephemeroptera                                                                  | 0,034        | 0,049  | 0,058  | 0,069 | 0,012               | 0,008 | 0,010 | 0,023 |
| Harpacticoid                                                                   | 0,339        | 0,316  | 0,331  | 0,331 | 0,013               | 0,009 | 0,011 | 0,024 |
| Nematod                                                                        | 0,071        | 0,094  | 0,091  | 0,095 | 0,011               | 0,007 | 0,009 | 0,020 |
| Ostracod                                                                       | 0,358        | 0,364  | 0,331  | 0,340 | 0,016               | 0,011 | 0,013 | 0,029 |
| Tardigrade                                                                     | 0,040        | 0,030  | 0,035  | 0,021 | 0,004               | 0,003 | 0,003 | 0,008 |
| library 2                                                                      |              |        |        |       |                     |       |       |       |
| Algae                                                                          | 0,021        | -0,014 | -0,005 | 0,001 | 0,015               | 0,011 | 0,011 | 0,023 |
| Cyclops                                                                        | 0,156        | 0,166  | 0,169  | 0,149 | 0,015               | 0,011 | 0,012 | 0,023 |
| Ephemeroptera                                                                  | 0,041        | 0,060  | 0,069  | 0,079 | 0,014               | 0,011 | 0,011 | 0,023 |
| Harpacticoid                                                                   | 0,360        | 0,339  | 0,352  | 0,349 | 0,014               | 0,011 | 0,011 | 0,023 |
| Nematod                                                                        | 0,060        | 0,083  | 0,080  | 0,086 | 0,012               | 0,009 | 0,009 | 0,018 |
| Ostracod                                                                       | 0,310        | 0,328  | 0,291  | 0,312 | 0,017               | 0,013 | 0,013 | 0,027 |
| Tardigrade                                                                     | 0,052        | 0,038  | 0,044  | 0,024 | 0,006               | 0,005 | 0,005 | 0,010 |
| library 3                                                                      |              |        |        |       |                     |       |       |       |
| Algae                                                                          | 0,023        | -0,009 | -0,003 | 0,008 | 0,015               | 0,010 | 0,011 | 0,021 |
| Cyclops                                                                        | 0,166        | 0,175  | 0,178  | 0,152 | 0,017               | 0,011 | 0,012 | 0,023 |
| Ephemeroptera                                                                  | 0,056        | 0,082  | 0,095  | 0,116 | 0,022               | 0,014 | 0,016 | 0,030 |
| Harpacticoid                                                                   | 0,316        | 0,297  | 0,306  | 0,308 | 0,014               | 0,009 | 0,010 | 0,019 |
| Nematod                                                                        | 0,054        | 0,074  | 0,070  | 0,075 | 0,010               | 0,006 | 0,007 | 0,014 |
| Ostracod                                                                       | 0,320        | 0,333  | 0,299  | 0,311 | 0,018               | 0,011 | 0,013 | 0,024 |
| Tardigrade                                                                     | 0,065        | 0,048  | 0,056  | 0,031 | 0,008               | 0,005 | 0,006 | 0,011 |
| library 4                                                                      |              |        |        |       |                     |       |       |       |
| Algae                                                                          | 0,019        | -0,004 | 0,001  | 0,009 | 0,011               | 0,007 | 0,008 | 0,015 |
| Cyclops                                                                        | 0,139        | 0,148  | 0,152  | 0,136 | 0,014               | 0,008 | 0,011 | 0,019 |
| Ephemeroptera                                                                  | 0,034        | 0,050  | 0,059  | 0,069 | 0,015               | 0,009 | 0,011 | 0,021 |
| Harpacticoid                                                                   | 0,349        | 0,327  | 0,341  | 0,342 | 0,015               | 0,009 | 0,011 | 0,021 |
| Nematod                                                                        | 0,054        | 0,076  | 0,074  | 0,075 | 0,012               | 0,007 | 0,009 | 0,017 |
| Ostracod                                                                       | 0,347        | 0,359  | 0,324  | 0,339 | 0,020               | 0,012 | 0,015 | 0,027 |
| Tardigrade                                                                     | 0,058        | 0,043  | 0,050  | 0,031 | 0,006               | 0,004 | 0,005 | 0,009 |

mix 3: A : C : E : H : N : O : T = 0 : 0.31 : 0.13 : 0.06 : 0.31 : 0.06 : 0.13

| replicates    | values found |       |        |        | standard deviations |       |       |       |
|---------------|--------------|-------|--------|--------|---------------------|-------|-------|-------|
|               | 1            | 2     | 3      | 4      | 1                   | 2     | 3     | 4     |
| library 1     |              |       |        |        |                     |       |       |       |
| Algae         | 0,000        | 0,008 | -0,002 | 0,005  | 0,006               | 0,006 | 0,006 | 0,010 |
| Cyclops       | 0,400        | 0,403 | 0,386  | 0,367  | 0,009               | 0,010 | 0,009 | 0,017 |
| Ephemeroptera | 0,156        | 0,151 | 0,137  | 0,170  | 0,010               | 0,010 | 0,009 | 0,017 |
| Harpacticoid  | 0,077        | 0,094 | 0,087  | 0,102  | 0,010               | 0,010 | 0,010 | 0,018 |
| Nematod       | 0,227        | 0,208 | 0,216  | 0,204  | 0,008               | 0,009 | 0,008 | 0,015 |
| Ostracod      | 0,065        | 0,058 | 0,099  | 0,082  | 0,012               | 0,013 | 0,012 | 0,022 |
| Tardigrade    | 0,075        | 0,078 | 0,076  | 0,070  | 0,003               | 0,003 | 0,003 | 0,006 |
| library 2     |              |       |        |        |                     |       |       |       |
| Algae         | -0,008       | 0,006 | -0,012 | -0,001 | 0,010               | 0,010 | 0,008 | 0,019 |
| Cyclops       | 0,417        | 0,416 | 0,403  | 0,381  | 0,010               | 0,010 | 0,008 | 0,019 |
| Ephemeroptera | 0,162        | 0,154 | 0,143  | 0,173  | 0,009               | 0,010 | 0,008 | 0,018 |
| Harpacticoid  | 0,088        | 0,101 | 0,098  | 0,108  | 0,009               | 0,009 | 0,008 | 0,018 |
| Nematod       | 0,200        | 0,184 | 0,191  | 0,182  | 0,008               | 0,008 | 0,006 | 0,015 |
| Ostracod      | 0,049        | 0,043 | 0,082  | 0,072  | 0,011               | 0,011 | 0,009 | 0,022 |
| Tardigrade    | 0,092        | 0,095 | 0,094  | 0,085  | 0,004               | 0,004 | 0,003 | 0,008 |
| library 3     |              |       |        |        |                     |       |       |       |
| Algae         | -0,009       | 0,002 | -0,010 | -0,001 | 0,008               | 0,007 | 0,008 | 0,014 |
| Cyclops       | 0,406        | 0,406 | 0,396  | 0,370  | 0,009               | 0,007 | 0,009 | 0,016 |
| Ephemeroptera | 0,217        | 0,209 | 0,192  | 0,235  | 0,012               | 0,010 | 0,012 | 0,021 |
| Harpacticoid  | 0,064        | 0,077 | 0,074  | 0,084  | 0,007               | 0,006 | 0,007 | 0,013 |
| Nematod       | 0,160        | 0,145 | 0,154  | 0,144  | 0,005               | 0,004 | 0,005 | 0,010 |
| Ostracod      | 0,058        | 0,053 | 0,086  | 0,073  | 0,009               | 0,008 | 0,009 | 0,016 |
| Tardigrade    | 0,105        | 0,108 | 0,108  | 0,096  | 0,004               | 0,003 | 0,004 | 0,007 |
| library 4     |              |       |        |        |                     |       |       |       |
| Algae         | -0,002       | 0,008 | -0,004 | 0,004  | 0,007               | 0,007 | 0,006 | 0,012 |
| Cyclops       | 0,387        | 0,389 | 0,372  | 0,356  | 0,009               | 0,008 | 0,008 | 0,015 |
| Ephemeroptera | 0,156        | 0,149 | 0,135  | 0,167  | 0,010               | 0,009 | 0,008 | 0,016 |
| Harpacticoid  | 0,091        | 0,105 | 0,101  | 0,114  | 0,010               | 0,009 | 0,008 | 0,016 |
| Nematod       | 0,204        | 0,188 | 0,193  | 0,182  | 0,008               | 0,007 | 0,007 | 0,013 |
| Ostracod      | 0,061        | 0,054 | 0,097  | 0,080  | 0,013               | 0,012 | 0,011 | 0,021 |
| Tardigrade    | 0,104        | 0,107 | 0,105  | 0,097  | 0,004               | 0,004 | 0,004 | 0,007 |

| mix4: A : C : E : H : N : O : T = 0 : 0.06 : 0.31 : 0.13 : 0.06 : 0.13 : 0.31 |              |        |       |       |                     |       |       |       |
|-------------------------------------------------------------------------------|--------------|--------|-------|-------|---------------------|-------|-------|-------|
|                                                                               | values found |        |       |       | standard deviations |       |       |       |
| replicates                                                                    | 1            | 2      | 3     | 4     | 1                   | 2     | 3     | 4     |
| library 1                                                                     |              |        |       |       |                     |       |       |       |
| Algae                                                                         | -0,007       | 0,001  | 0,003 | 0,016 | 0,007               | 0,006 | 0,007 | 0,035 |
| Cyclops                                                                       | 0,083        | 0,083  | 0,101 | 0,190 | 0,011               | 0,010 | 0,011 | 0,057 |
| Ephemeroptera                                                                 | 0,329        | 0,334  | 0,337 | 0,285 | 0,011               | 0,010 | 0,012 | 0,058 |
| Harpacticoid                                                                  | 0,178        | 0,156  | 0,156 | 0,093 | 0,012               | 0,011 | 0,012 | 0,061 |
| Nematod                                                                       | 0,035        | 0,052  | 0,039 | 0,037 | 0,010               | 0,009 | 0,010 | 0,051 |
| Ostracod                                                                      | 0,171        | 0,169  | 0,158 | 0,214 | 0,015               | 0,013 | 0,015 | 0,076 |
| Tardigrade                                                                    | 0,211        | 0,203  | 0,205 | 0,166 | 0,004               | 0,003 | 0,004 | 0,020 |
| library 2                                                                     |              |        |       |       |                     |       |       |       |
| Algae                                                                         | -0,015       | -0,006 | 0,003 | 0,022 | 0,013               | 0,009 | 0,011 | 0,058 |
| Cyclops                                                                       | 0,078        | 0,080  | 0,096 | 0,185 | 0,013               | 0,009 | 0,011 | 0,059 |
| Ephemeroptera                                                                 | 0,332        | 0,336  | 0,335 | 0,288 | 0,013               | 0,009 | 0,011 | 0,058 |
| Harpacticoid                                                                  | 0,171        | 0,151  | 0,152 | 0,105 | 0,012               | 0,008 | 0,011 | 0,057 |
| Nematod                                                                       | 0,030        | 0,045  | 0,031 | 0,025 | 0,010               | 0,007 | 0,009 | 0,047 |
| Ostracod                                                                      | 0,145        | 0,147  | 0,133 | 0,174 | 0,015               | 0,010 | 0,012 | 0,068 |
| Tardigrade                                                                    | 0,258        | 0,247  | 0,250 | 0,201 | 0,005               | 0,004 | 0,004 | 0,024 |
| library 3                                                                     |              |        |       |       |                     |       |       |       |
| Algae                                                                         | -0,015       | -0,005 | 0,000 | 0,019 | 0,010               | 0,009 | 0,010 | 0,050 |
| Cyclops                                                                       | 0,070        | 0,070  | 0,085 | 0,168 | 0,011               | 0,010 | 0,011 | 0,054 |
| Ephemeroptera                                                                 | 0,402        | 0,407  | 0,405 | 0,358 | 0,015               | 0,013 | 0,015 | 0,072 |
| Harpacticoid                                                                  | 0,131        | 0,115  | 0,114 | 0,074 | 0,009               | 0,008 | 0,009 | 0,045 |
| Nematod                                                                       | 0,023        | 0,034  | 0,026 | 0,022 | 0,007               | 0,006 | 0,007 | 0,033 |
| Ostracod                                                                      | 0,124        | 0,125  | 0,115 | 0,148 | 0,012               | 0,010 | 0,012 | 0,057 |
| Tardigrade                                                                    | 0,264        | 0,254  | 0,255 | 0,210 | 0,005               | 0,004 | 0,005 | 0,025 |
| library 4                                                                     |              |        |       |       |                     |       |       |       |
| Algae                                                                         | -0,003       | 0,004  | 0,009 | 0,024 | 0,011               | 0,009 | 0,010 | 0,042 |
| Cyclops                                                                       | 0,077        | 0,077  | 0,091 | 0,176 | 0,014               | 0,012 | 0,012 | 0,053 |
| Ephemeroptera                                                                 | 0,301        | 0,306  | 0,309 | 0,266 | 0,015               | 0,013 | 0,013 | 0,057 |
| Harpacticoid                                                                  | 0,180        | 0,161  | 0,160 | 0,109 | 0,015               | 0,013 | 0,013 | 0,057 |
| Nematod                                                                       | 0,020        | 0,035  | 0,024 | 0,015 | 0,012               | 0,010 | 0,011 | 0,047 |
| Ostracod                                                                      | 0,158        | 0,160  | 0,147 | 0,193 | 0,019               | 0,017 | 0,017 | 0,075 |
| Tardigrade                                                                    | 0,267        | 0,256  | 0,260 | 0,217 | 0,006               | 0,005 | 0,006 | 0,025 |
